# Supplementary material
Source: PubMed Central journal article supplement (PMC5363695)
Supplement: EBM694098_supplementary_material.pdf [file EBM694098_supplementary_material.pdf]

**Table S1. Instrumentation setup for the targeted metabolites in this study**

| <b>Compound</b>                         | <b>Retention Time (min)</b> | <b>Polarity</b> | <b>Precursor (m/z)</b> | <b>Product1 (m/z)</b> | <b>Product2 (m/z)</b> | <b>Collision Energy1 (V)</b> | <b>Collision Energy2 (V)</b> | <b>RF Lens (V)</b> |
|-----------------------------------------|-----------------------------|-----------------|------------------------|-----------------------|-----------------------|------------------------------|------------------------------|--------------------|
| paraxanthine                            | 1.35                        | Positive        | 181.213                | 108.9                 | 124.1                 | 10.253                       | 20.9                         | 84                 |
| 2,4-dihydropyrimidine-5-carboxylic acid | 1.5                         | Positive        | 157.091                | 116.1                 | 139                   | 10.253                       | 12.5                         | 45                 |
| deoxyribose                             | 1.12                        | Positive        | 135.122                | 94.06                 | 107                   | 10.253                       | 10.3                         | 56                 |
| alpha-hydroxyisobutyric acid            | 1.13                        | Positive        | 105.122                | 51.1                  | 77.04                 | 27.191                       | 10.3                         | 82                 |
| uridine 5'-diphosphate                  | 1.13                        | Positive        | 405.122                | 388.5                 |                       | 10.253                       |                              | 81                 |
| galactarate                             | 1.16                        | Positive        | 211.122                | 175.1                 | 193.2                 | 11.82                        | 10.3                         | 51                 |
| lauroylcarnitine                        | 1.17                        | Positive        | 344.243                | 84.99                 | 285                   | 22.742                       | 15.9                         | 94                 |
| 2'-deoxyguanosine                       | 1.19                        | Positive        | 286.183                | 214                   | 268                   | 15.764                       | 18                           | 70                 |
| dihydroxyacetone phosphate              | 1.2                         | Positive        | 183.152                | 105.1                 | 165.1                 | 14.753                       | 10.3                         | 52                 |
| glycolaldehyde dimer                    | 1.21                        | Positive        | 121.122                | 77.11                 | 103.1                 | 20.871                       | 10.3                         | 49                 |
| D-glucose 6-phosphate                   | 1.21                        | Positive        | 261.183                | 129                   | 189.1                 | 16.169                       | 10.3                         | 75                 |
| D-ribose 1,5-bisphosphate               | 1.21                        | Positive        | 311.183                | 101.2                 | 221.1                 | 10.253                       | 14.4                         | 71                 |
| glutaric acid                           | 1.22                        | Positive        | 133.122                | 105.2                 | 115.1                 | 15.258                       | 10.3                         | 37                 |
| ethanolamine phosphate                  | 1.23                        | Positive        | 142.639                | 85.11                 | 125.1                 | 11.567                       | 10.3                         | 44                 |
| inosine                                 | 1.23                        | Positive        | 268.939                | 180.9                 | 252.9                 | 46.404                       | 25.9                         | 249                |
| homocystine                             | 1.23                        | Positive        | 268.97                 | 180.9                 | 252.9                 | 45.545                       | 24.9                         | 249                |
| isopentyl pyrophosphate                 | 1.23                        | Positive        | 298.03                 | 205.8                 | 282.1                 | 55                           | 10.3                         | 58                 |
| thiamine monophosphate                  | 1.23                        | Positive        | 345.122                | 84.9                  |                       | 18.697                       |                              | 88                 |
| shikimate                               | 1.25                        | Positive        | 175.122                | 119.1                 | 147.1                 | 16.219                       | 14                           | 56                 |
| tetrahydrofolate                        | 1.25                        | Positive        | 446.091                | 341.9                 | 430.1                 | 15.713                       | 11.1                         | 77                 |
| 3-hydroxybutanoic acid                  | 1.27                        | Positive        | 105.104                | 73.11                 | 87.11                 | 10.253                       | 10.3                         | 30                 |
| D-glyceric acid                         | 1.28                        | Positive        | 107.043                | 79.05                 | 89.06                 | 10.253                       | 10.3                         | 41                 |
| trans-aconitate                         | 1.28                        | Positive        | 175.152                | 73.18                 | 143.1                 | 10.253                       | 10.3                         | 30                 |
| mevalolactone                           | 1.3                         | Positive        | 131.122                | 69.11                 | 113.1                 | 10.253                       | 10.3                         | 46                 |
| inosine 5'-diphosphate                  | 1.3                         | Positive        | 429.03                 | 340.2                 |                       | 18.09                        |                              | 132                |
| indoxyl sulfate                         | 1.32                        | Positive        | 134.122                | 93.06                 | 106.1                 | 10.253                       | 14.6                         | 93                 |

|                                |      |          |         |       |       |        |      |     |
|--------------------------------|------|----------|---------|-------|-------|--------|------|-----|
| <b>D-lactose</b>               | 1.32 | Positive | 361.03  | 343   | 352   | 10.253 | 10.9 | 84  |
| <b>caffeine</b>                | 1.35 | Positive | 195.152 | 110.1 | 138.1 | 22.944 | 19.6 | 81  |
| <b>theophylline</b>            | 1.38 | Positive | 181.061 | 124.1 | 163.1 | 19.152 | 10.3 | 58  |
| <b>formate</b>                 | 1.39 | Positive | 47.213  | 15.44 | 31.22 | 18.09  | 10.3 | 65  |
| <b>methylguanidine</b>         | 1.4  | Positive | 74.152  | 33.22 | 42.22 | 13.489 | 10.3 | 30  |
| <b>N-acetyl-D-tryptophan</b>   | 1.41 | Positive | 247.152 | 159.1 | 201.1 | 18.292 | 11.4 | 46  |
| <b>5'-methylthioadenosine</b>  | 1.41 | Positive | 298.091 | 136.1 | 163   | 17.685 | 10.3 | 66  |
| <b>1,3-diaminopropane</b>      | 1.42 | Positive | 75.061  | 43.18 | 57.11 | 10.253 | 10.3 | 66  |
| <b>aniline-2-sulfonic acid</b> | 1.42 | Positive | 174.03  | 92.11 | 156.1 | 16.978 | 10.3 | 55  |
| <b>thymine</b>                 | 1.44 | Positive | 127.304 | 84.04 | 110.1 | 15.865 | 15.9 | 62  |
| <b>glycerol</b>                | 1.45 | Positive | 93.122  | 43.22 | 61.11 | 10.253 | 10.3 | 30  |
| <b>nicotinamide</b>            | 1.45 | Positive | 123.122 | 78.11 | 80.11 | 23.197 | 20.2 | 68  |
| <b>theobromine</b>             | 1.45 | Positive | 181.152 | 138   | 163.1 | 17.129 | 16   | 85  |
| <b>thymidine</b>               | 1.45 | Positive | 243.122 | 117   | 127.1 | 10.607 | 10.3 | 31  |
| <b>2-deoxy-D-glucose</b>       | 1.46 | Positive | 165.639 | 129   | 148.1 | 22.539 | 18.4 | 55  |
| <b>thiourea</b>                | 1.5  | Positive | 77.122  | 43.15 | 60.04 | 35.888 | 18   | 43  |
| <b>nicotinate</b>              | 1.5  | Positive | 124.091 | 96.11 | 106.1 | 11.315 | 10.3 | 53  |
| <b>5'-deoxyadenosine</b>       | 1.51 | Positive | 252.122 | 119   | 136   | 45.039 | 15.5 | 54  |
| <b>trigonelline</b>            | 2.02 | Positive | 138.122 | 92.11 | 120   | 19.354 | 10.3 | 66  |
| <b>D-pantothenic acid</b>      | 1.52 | Positive | 220.152 | 90.11 | 202   | 10.253 | 13   | 53  |
| <b>formyl-L-methionyl</b>      | 1.53 | Positive | 178.122 | 104.1 | 130   | 16.32  | 11.3 | 58  |
| <b>purine</b>                  | 1.54 | Positive | 121.122 | 67.11 | 94    | 28.455 | 20.7 | 102 |
| <b>2,4-dihydroxypteridine</b>  | 1.57 | Positive | 165.152 | 120.1 | 148   | 20.517 | 15.5 | 77  |
| <b>S-hexyl-glutathione</b>     | 1.58 | Positive | 392.183 | 246   | 263   | 14.298 | 11.1 | 75  |
| <b>riboflavin</b>              | 1.63 | Positive | 377.152 | 198   | 243   | 35.736 | 22.1 | 112 |
| <b>uridine</b>                 | 1.65 | Positive | 245.152 | 113.1 | 117   | 10.253 | 10.3 | 48  |
| <b>coenzyme A</b>              | 2.16 | Positive | 768.152 | 428.1 |       | 22.792 |      | 113 |
| <b>urocanate</b>               | 1.68 | Positive | 139.152 | 91.13 | 111   | 17.129 | 10.3 | 57  |
| <b>adenosine</b>               | 1.68 | Positive | 268.122 | 119   | 136.1 | 46.253 | 19.1 | 70  |
| <b>D-(+)-glucosamine</b>       | 1.69 | Positive | 180.152 | 139.2 | 163.1 | 11.871 | 10.3 | 43  |
| <b>D-glucono-1, 5-lactone</b>  | 1.73 | Positive | 179.15  | 119.1 | 161   | 13.236 | 11   | 62  |

|                                             |      |          |         |       |       |        |      |      |
|---------------------------------------------|------|----------|---------|-------|-------|--------|------|------|
| <b>3',5'-cyclic AMP</b>                     | 1.73 | Positive | 330.091 | 136   | 312   | 23.803 | 17.3 | 84   |
| <b>3-ureidopropionate</b>                   | 1.74 | Positive | 133.122 | 90.1  | 115   | 10.253 | 10.3 | 43   |
| <b>adenosine 3',5'-cyclic monophosphate</b> | 1.75 | Positive | 329.983 | 136.1 | 312   | 24.815 | 16.8 | 87   |
| <b>tryptophan</b>                           | 1.78 | Positive | 205.15  | 146   | 188   | 18.242 | 12.6 | 64   |
| <b>L-kynurenine</b>                         | 1.78 | Positive | 209.152 | 94.11 | 192   | 15.966 | 10.3 | 57.7 |
| <b>D-tryptophan</b>                         | 1.8  | Positive | 205.152 | 146   | 188.1 | 15.764 | 10.8 | 41   |
| <b>norleucine</b>                           | 1.81 | Positive | 132.152 | 69.11 | 86.17 | 15.663 | 11.9 | 30   |
| <b>isoleucine</b>                           | 1.81 | Positive | 132.152 | 69.18 | 86.18 | 16.674 | 10.3 | 40   |
| <b>leucine</b>                              | 1.81 | Positive | 132.152 | 86.11 | 114.1 | 10.253 | 10.3 | 47   |
| <b>6'-hydroxynicotinate</b>                 | 1.82 | Positive | 140.122 | 94.04 | 122.1 | 21.983 | 17.6 | 86   |
| <b>N-acetyl-DL-glutamic acid</b>            | 1.83 | Positive | 190.183 | 84.11 | 130.1 | 22.792 | 12.3 | 47   |
| <b>N-alpha-acetyl-L-lysine</b>              | 2.35 | Positive | 189.152 | 84.11 | 129.1 | 21.781 | 14   | 53   |
| <b>phenylalanine</b>                        | 1.86 | Positive | 166.15  | 103.1 | 120.1 | 27.65  | 13.8 | 54   |
| <b>deoxycytidine</b>                        | 1.86 | Positive | 228.152 | 94.99 | 112   | 35.079 | 10.3 | 30   |
| <b>5-oxo-D-proline</b>                      | 1.89 | Positive | 130.122 | 84.04 | 102   | 10.253 | 10.3 | 57   |
| <b>acetylcholine</b>                        | 1.89 | Positive | 147.152 | 87.04 | 88.11 | 13.64  | 10.3 | 51   |
| <b>N-alpha-acetyl-L-asparagine</b>          | 1.9  | Positive | 175.152 | 133   |       | 10.556 |      | 65   |
| <b>N-acetyl-L-cysteine</b>                  | 1.91 | Positive | 163.122 | 43.22 | 121.1 | 16.876 | 10.3 | 57   |
| <b>pyrazole</b>                             | 1.92 | Positive | 67.97   | 40.17 | 41.17 | 10.253 | 18.6 | 115  |
| <b>cytidine</b>                             | 1.93 | Positive | 244.152 | 95.06 | 112.1 | 40.893 | 16.3 | 46.8 |
| <b>SN-glycero-3-phosphocholine</b>          | 2.43 | Positive | 259.183 | 105.1 | 125   | 15.157 | 26.9 | 79   |
| <b>cytidine 2'3'-cyclic monophosphate</b>   | 1.93 | Positive | 306.03  | 112   | 177.9 | 15.461 | 19.1 | 61   |
| <b>methionine</b>                           | 1.95 | Positive | 150.122 | 104.1 | 133   | 11.112 | 10.3 | 46   |
| <b>D-glucuronoactone</b>                    | 1.95 | Positive | 177.274 | 121.1 | 149.1 | 15.865 | 12.8 | 72   |
| <b>N-acetyl-D-glucosamine</b>               | 1.95 | Positive | 222.304 | 144.2 | 167.9 | 17.685 | 10.3 | 55.7 |
| <b>maleimide</b>                            | 1.96 | Positive | 98.152  | 57.11 | 70.11 | 10.253 | 13.9 | 44   |
| <b>selenomethionine</b>                     | 1.96 | Positive | 198.183 | 109   | 180.9 | 24.107 | 11.9 | 43   |
| <b>creatinine</b>                           | 1.97 | Positive | 114.122 | 44.22 | 86.11 | 17.281 | 11.3 | 38   |
| <b>3-hydroxykynurenine</b>                  | 1.97 | Positive | 225.152 | 162.1 | 208.1 | 19.253 | 10.3 | 57   |
| <b>N-acetyl-D-galactosamine</b>             | 1.98 | Positive | 222.152 | 126.1 | 204.1 | 12.983 | 10.3 | 35   |
| <b>5-methylcytosine hydrochloride</b>       | 2    | Positive | 126.152 | 108   | 109   | 18.949 | 20.1 | 88   |

|                                                                               |      |          |         |       |       |        |      |      |
|-------------------------------------------------------------------------------|------|----------|---------|-------|-------|--------|------|------|
| <b>uridine-5-monophosphate</b>                                                | 2    | Positive | 325.183 | 185.1 | 307.2 | 26.382 | 12.4 | 79   |
| <b>5-aminoimidazole 4-carboxamide-1-beta-D-ribofuranosyl-5'-monophosphate</b> | 2.5  | Positive | 339.061 | 127.1 | 206   | 12.478 | 10.3 | 65   |
| <b>cytosine</b>                                                               | 2.02 | Positive | 112.3   | 69.11 | 95.05 | 16.775 | 21.5 | 72   |
| <b>5-hydroxy-L-tryptophan</b>                                                 | 2.02 | Positive | 221.152 | 162.1 | 204   | 19     | 11   | 52   |
| <b>citramalate</b>                                                            | 2.03 | Positive | 149.122 | 93.06 | 121.1 | 17.635 | 15.8 | 73   |
| <b>Betaine</b>                                                                | 2.04 | Positive | 118.152 | 58.17 | 59.17 | 23.399 | 19   | 80   |
| <b>proline</b>                                                                | 2.05 | Positive | 116.152 | 70.11 | 88.11 | 12.831 | 13.2 | 56   |
| <b>taurine</b>                                                                | 2.06 | Positive | 126.122 | 81.05 | 108   | 16.067 | 10.3 | 53.7 |
| <b>O-acetyl-L-serine</b>                                                      | 2.07 | Positive | 148.091 | 113   | 131.1 | 10.253 | 10.3 | 30   |
| <b>N-acetylneuramate</b>                                                      | 2.07 | Positive | 309.726 | 255.2 | 292   | 16.573 | 10.3 | 70   |
| <b>tyrosine</b>                                                               | 2.08 | Positive | 182.15  | 136.1 | 165   | 10.25  | 11.4 | 40   |
| <b>adenosine 5'-monophosphate</b>                                             | 2.08 | Positive | 348.183 | 136.1 |       | 23.146 |      | 73   |
| <b>inosine 5'-monophosphate</b>                                               | 2.58 | Positive | 349.122 | 137.1 |       | 13.893 |      | 78   |
| <b>valine</b>                                                                 | 2.1  | Positive | 118.152 | 72.11 | 100.1 | 13.691 | 13.4 | 56   |
| <b>guanine</b>                                                                | 2.11 | Positive | 152.243 | 123.9 | 134   | 16.27  | 13.5 | 84   |
| <b>pyridoxine</b>                                                             | 2.11 | Positive | 170.03  | 134   | 151.9 | 20.669 | 12.3 | 52   |
| <b>O-succinyl-L-homoserine</b>                                                | 2.12 | Positive | 220.122 | 102.1 | 120   | 11.416 | 13.8 | 60   |
| <b>pipecolate</b>                                                             | 2.14 | Positive | 130.122 | 84.11 | 102.1 | 12.933 | 10.4 | 53.2 |
| <b>maleamate</b>                                                              | 2.15 | Positive | 116.122 | 72.17 | 88.11 | 12.831 | 13.3 | 53   |
| <b>D-aspartate</b>                                                            | 2.15 | Positive | 134.152 | 86.11 | 116.1 | 19.202 | 10.3 | 48.5 |
| <b>5,6-dihydrouracil</b>                                                      | 2.16 | Positive | 115.122 | 42.22 | 74.11 | 10.253 | 10.3 | 30   |
| <b>cysteine</b>                                                               | 2.17 | Positive | 122.122 | 59.04 | 76.06 | 22.135 | 13.1 | 34   |
| <b>hypotaurine</b>                                                            | 2.18 | Positive | 110.091 | 82.13 | 92.06 | 12.427 | 10.3 | 58   |
| <b>ophthalmic acid</b>                                                        | 2.19 | Positive | 290.139 | 161.1 | 215   | 12.478 | 10.3 | 68   |
| <b>S-carboxymethyl-L-cysteine</b>                                             | 2.2  | Positive | 180.122 | 117.1 | 163   | 15.208 | 10.3 | 53   |
| <b>galactitol</b>                                                             | 2.21 | Positive | 183.122 | 129   | 165.1 | 10.253 | 10.3 | 56   |
| <b>glycolate</b>                                                              | 2.22 | Positive | 77.152  | 45.17 | 59.11 | 10.253 | 10.3 | 36.9 |
| <b>(2R,3R)-(-)-2, 3-butanediol</b>                                            | 2.22 | Positive | 91.122  | 50.17 | 65.11 | 10.253 | 19.7 | 98   |
| <b>alpha-aminoadipate</b>                                                     | 2.22 | Positive | 162.243 | 108.9 | 127   | 32.702 | 20.3 | 75   |
| <b>4-hydroxy-L-proline</b>                                                    | 2.23 | Positive | 132.152 | 90.04 | 114.1 | 13.388 | 10.3 | 48   |

|                                          |      |          |         |       |       |        |      |     |
|------------------------------------------|------|----------|---------|-------|-------|--------|------|-----|
| <b>trans-4-hydroxyproline</b>            | 2.23 | Positive | 132.274 | 68.05 | 86.13 | 21.124 | 11.7 | 34  |
| <b>4-hydroxy-L-phenylglycine</b>         | 2.23 | Positive | 168.122 | 123.1 | 151.1 | 18.14  | 10.3 | 30  |
| <b>kynurenine</b>                        | 2.23 | Positive | 209.152 | 179   | 193   | 21.68  | 19.4 | 102 |
| <b>glutathione</b>                       | 2.23 | Positive | 308.304 | 162.1 | 179.1 | 14.955 | 10.8 | 77  |
| <b>glycine</b>                           | 2.24 | Positive | 76.373  | 42.17 | 58.1  | 10.253 | 10.3 | 30  |
| <b>mesoxalate</b>                        | 2.24 | Positive | 119.122 | 91.11 | 101.2 | 15.713 | 10.3 | 53  |
| <b>cis-4-hydroxy-D-proline</b>           | 2.24 | Positive | 132.122 | 68.11 | 86.11 | 22.388 | 10.3 | 52  |
| <b>alanine</b>                           | 2.25 | Positive | 90.122  | 44.15 | 62.11 | 10.253 | 10.3 | 30  |
| <b>2-amino-2-methylpropanoate</b>        | 2.25 | Positive | 104.122 | 45.15 | 58.17 | 10.253 | 11.4 | 30  |
| <b>3-aminoisobutanoate</b>               | 2.25 | Positive | 104.152 | 30.29 | 86.11 | 12.781 | 10.3 | 30  |
| <b>diethanolamine</b>                    | 2.25 | Positive | 106.152 | 70.11 | 88.11 | 10.253 | 11   | 30  |
| <b>N-acetyl glycine</b>                  | 2.25 | Positive | 118.152 | 72.09 | 100   | 16.32  | 13.1 | 59  |
| <b>L-norvaline</b>                       | 2.25 | Positive | 118.152 | 72.11 | 100.1 | 15.764 | 13.9 | 59  |
| <b>L-homocysteine thiolactone</b>        | 2.25 | Positive | 118.152 | 90.07 | 100   | 10.253 | 13.7 | 55  |
| <b>N-amidino-L-aspartate</b>             | 2.25 | Positive | 176.122 | 88.06 | 134   | 14.854 | 10.3 | 59  |
| <b>N-acetyl-DL-serine</b>                | 2.26 | Positive | 148.087 | 60.1  | 106.1 | 16.775 | 10.3 | 31  |
| <b>ethyl 3-ureidopropionate</b>          | 2.26 | Positive | 161.122 | 92.06 | 120   | 13.236 | 10.3 | 56  |
| <b>DL-normetanephrine</b>                | 2.26 | Positive | 184.152 | 134.1 | 166.1 | 19.556 | 10.3 | 34  |
| <b>glyceraldehyde</b>                    | 2.27 | Positive | 91.152  | 63.04 | 65.11 | 27.697 | 20.5 | 131 |
| <b>5-aminolevulinic acid</b>             | 2.27 | Positive | 132.091 | 90    | 114.1 | 10.253 | 11.3 | 46  |
| <b>2-aminoethyl dihydrogen phosphate</b> | 2.27 | Positive | 142.122 | 42.22 | 83.11 | 12.73  | 10.3 | 30  |
| <b>3-sulfinyl-L-alanine</b>              | 2.27 | Positive | 154.122 | 106.1 | 122   | 14.551 | 10.3 | 63  |
| <b>adenosine 5'-diphosphoribose</b>      | 2.27 | Positive | 560.152 | 348   | 428.1 | 14.652 | 20.3 | 91  |
| <b>1-methylnicotinamide</b>              | 2.28 | Positive | 138.152 | 93.1  | 95.06 | 21.174 | 19.6 | 78  |
| <b>4-guanidinobutanoate</b>              | 2.28 | Positive | 146.152 | 86.06 | 87.04 | 15.865 | 13.4 | 57  |
| <b>octopamine</b>                        | 2.28 | Positive | 154.152 | 113.1 | 136   | 10.253 | 10.3 | 45  |
| <b>noradrenaline</b>                     | 2.28 | Positive | 170.183 | 93.04 | 152   | 26.129 | 10.3 | 83  |
| <b>epinephrine</b>                       | 2.28 | Positive | 184.087 | 166   |       | 11.213 |      | 61  |
| <b>D-(+)-galacturonic acid</b>           | 2.28 | Positive | 213.152 | 113.2 | 121.1 | 14.449 | 11.6 | 57  |
| <b>N-formylglycine</b>                   | 2.29 | Positive | 104.152 | 45.15 | 63.1  | 17.079 | 10.3 | 50  |
| <b>choline</b>                           | 2.29 | Positive | 105.122 | 51.11 | 77.11 | 27.292 | 10.3 | 75  |

|                                                 |      |          |         |       |       |        |      |      |
|-------------------------------------------------|------|----------|---------|-------|-------|--------|------|------|
| <b>N-acetylputrescene</b>                       | 2.29 | Positive | 131.152 | 72.17 | 114.1 | 15.461 | 10.3 | 48   |
| <b>dopamine</b>                                 | 2.33 | Positive | 154.152 | 91.18 | 137.1 | 21.781 | 12.7 | 46   |
| <b>D-alanine</b>                                | 2.34 | Positive | 90.152  | 44.22 | 45.22 | 11.011 | 10.3 | 42   |
| <b>ethanolamine</b>                             | 2.35 | Positive | 62.152  | 44.18 | 46.11 | 12.376 | 34.2 | 51   |
| <b>creatine</b>                                 | 2.36 | Positive | 132.122 | 86.11 | 114.1 | 10.253 | 10.3 | 39   |
| <b>4-aminobutanoate</b>                         | 2.38 | Positive | 104.122 | 86.05 | 87.13 | 10.657 | 10.4 | 46.8 |
| <b>5-aminopentanoate</b>                        | 2.39 | Positive | 118.152 | 55.15 | 101.1 | 16.421 | 10.3 | 52   |
| <b>homoserine</b>                               | 2.39 | Positive | 120.122 | 56.11 | 74.11 | 17.028 | 10.3 | 41   |
| <b>threonine</b>                                | 2.39 | Positive | 120.122 | 74.11 | 102.1 | 10.253 | 10.3 | 41   |
| <b>L-carnitine</b>                              | 2.39 | Positive | 162.122 | 85.07 | 103   | 20.517 | 17   | 78   |
| <b>Beta-Alanine</b>                             | 2.43 | Positive | 90.152  | 45.15 | 72.11 | 10.253 | 10.3 | 40.6 |
| <b>L-allothreonine</b>                          | 2.43 | Positive | 120.122 | 60.1  | 102.1 | 10.253 | 10.3 | 41   |
| <b>glutamine</b>                                | 2.45 | Positive | 147.152 | 84.11 | 130   | 18.242 | 11.8 | 62   |
| <b>4-imidazoleacetic acid</b>                   | 2.46 | Positive | 127.152 | 81.04 | 109   | 16.522 | 10.3 | 47   |
| <b>guanidinoacetate</b>                         | 2.49 | Positive | 118.152 | 72.18 | 100.2 | 15.865 | 13.5 | 56   |
| <b>deoxycarnitine</b>                           | 2.51 | Positive | 146.152 | 60.17 | 87.04 | 13.843 | 15.7 | 57   |
| <b>hydroxypyruvate</b>                          | 2.57 | Positive | 105.152 | 63.13 | 64.07 | 10.253 | 10.3 | 30   |
| <b>2-hydroxybutyric acid</b>                    | 2.6  | Positive | 105.122 | 23.33 | 64.04 | 10.253 | 10.3 | 30   |
| <b>L-anserine</b>                               | 2.61 | Positive | 304.061 | 214.9 | 244.9 | 15.157 | 14.9 | 87   |
| <b>thymidine 5'-monophosphate</b>               | 2.63 | Positive | 323.122 | 202   | 282   | 15.107 | 10.3 | 43   |
| <b>histamine</b>                                | 2.64 | Positive | 112.152 | 68.11 | 95.11 | 19.758 | 11.1 | 52   |
| <b>inosine 5'-triphosphate</b>                  | 2.66 | Positive | 508.939 | 262.9 | 344.9 | 24.612 | 10.3 | 89   |
| <b>asparagine</b>                               | 2.67 | Positive | 133.122 | 74.04 | 87.11 | 15.612 | 10.3 | 36   |
| <b>L-methionine sulfoximine</b>                 | 2.67 | Positive | 181.061 | 74.11 | 102.1 | 14.904 | 10.3 | 38   |
| <b>cytidine 5'-diphosphocholine</b>             | 3.2  | Positive | 490.183 | 264.9 | 379   | 25.927 | 13   | 103  |
| <b>L-histidinol</b>                             | 2.71 | Positive | 142.152 | 81.04 | 124.2 | 19.506 | 10.4 | 52   |
| <b>serine</b>                                   | 2.74 | Positive | 106.15  | 60.11 | 88    | 10.25  | 10.3 | 42   |
| <b>alpha-D-glucose 1-phosphate</b>              | 2.82 | Positive | 261.087 | 163.1 | 242.9 | 10.253 | 10.3 | 59   |
| <b>D-glucosamine 6-sulfate</b>                  | 2.84 | Positive | 260.174 | 162   | 242.1 | 10.657 | 11   | 53   |
| <b>2-acetamido-2-deoxy-beta-D-glucosylamine</b> | 2.86 | Positive | 221.152 | 138.1 | 161   | 16.674 | 11.5 | 55   |
| <b>pyridoxamine</b>                             | 2.87 | Positive | 169.122 | 134.1 | 152.1 | 22.135 | 11.7 | 30   |

|                                              |      |          |         |       |       |        |      |     |
|----------------------------------------------|------|----------|---------|-------|-------|--------|------|-----|
| glutamic acid                                | 2.95 | Positive | 148.152 | 84.2  | 130.3 | 15.006 | 10.9 | 45  |
| 3-methylhistamine                            | 2.96 | Positive | 126.152 | 96.13 | 109.2 | 21.022 | 16.4 | 62  |
| histidine                                    | 3.15 | Positive | 156     | 83.02 | 110.1 | 23.348 | 12.1 | 49  |
| D-mannosamine                                | 3.29 | Positive | 180.152 | 83.99 | 162.1 | 15.107 | 11.5 | 33  |
| aspartic acid                                | 3.34 | Positive | 134.243 | 59.04 | 87.99 | 26.331 | 10.3 | 40  |
| O-phospho-DL-serine                          | 4    | Positive | 186.152 | 88.13 | 145.1 | 10.253 | 10.3 | 54  |
| D-(+)-galactosamine                          | 3.51 | Positive | 180.087 | 152.1 | 162.1 | 10.253 | 12.4 | 64  |
| stachyose                                    | 4.02 | Positive | 667     | 416.9 |       | 15.612 |      | 115 |
| glucosaminat                                 | 3.53 | Positive | 196.152 | 132   | 178.1 | 13.691 | 10.3 | 68  |
| NAD                                          | 3.53 | Positive | 664.152 | 428   | 444   | 25.725 | 25.5 | 99  |
| nepsilon, nepsilon, nepsilon-trimethyllysine | 3.7  | Positive | 189.183 | 84.11 | 130.1 | 20.567 | 13.7 | 70  |
| carnosine                                    | 3.76 | Positive | 227.122 | 192.9 | 209.1 | 26.23  | 10.3 | 66  |
| homocysteine                                 | 3.8  | Positive | 136.091 | 89.97 | 91.04 | 10.91  | 18.8 | 65  |
| arginine                                     | 3.85 | Positive | 175.152 | 70.11 | 116   | 21.579 | 10.3 | 64  |
| lysine                                       | 3.94 | Positive | 147.122 | 84.02 | 130.2 | 15.612 | 13.1 | 43  |
| agmatine sulfate                             | 4.03 | Positive | 130.97  | 89.11 | 113.1 | 10.253 | 10.3 | 35  |
| L-ornithine                                  | 4.36 | Positive | 133.122 | 70.04 | 116.1 | 18.697 | 10.3 | 38  |
| D-orinthine                                  | 4.36 | Positive | 133.152 | 105.1 | 115.1 | 15.511 | 11.7 | 47  |
| L-2, 3-diaminopropionic acid                 | 4.54 | Positive | 105.122 | 64.11 | 88.11 | 10.253 | 10.3 | 30  |
| cystine                                      | 4.7  | Positive | 241.304 | 120   | 151.9 | 18.393 | 12.7 | 59  |
| DL-5-hydroxylysine                           | 4.85 | Positive | 163.152 | 128   | 145.2 | 10.253 | 10.3 | 53  |
| D-glucosamine 6-phosphate                    | 5.28 | Positive | 260     | 126.1 | 144.1 | 10.253 | 14.7 | 72  |
| phosphocholine                               | 5.8  | Positive | 184.091 | 86.18 | 125   | 16.775 | 19.2 | 62  |
| dihydroxyfumaric acid                        | 1.22 | Negative | 165.122 | 149   |       | 16.27  |      | 60  |
| phospho(enol) pyruvic acid                   | 1.5  | Negative | 167.03  | 78.97 | 83.1  | 10.253 | 11.2 | 0   |
| (S)-malate                                   | 1.68 | Negative | 133.061 | 71.16 | 115.1 | 10.253 | 10.3 | 0   |
| N-acetyl-DL-methionine                       | 1.28 | Negative | 190.183 | 141.9 | 147.9 | 15.36  | 12.4 | 0   |
| N-acetyl-L-alanine                           | 1.34 | Negative | 129.97  | 88.18 |       | 12.174 |      | 53  |
| (R)-malate                                   | 1.67 | Negative | 133.091 | 73.11 | 115.1 | 17.331 | 16.5 | 44  |
| isocitric acid                               | 1.79 | Negative | 191.122 | 85.08 | 111.1 | 11.011 | 13.5 | 0   |
| pyridoxal 5'-phosphate                       | 1.99 | Negative | 263.974 | 99    |       | 19.607 |      | 59  |

|                                               |      |          |         |       |       |        |      |     |
|-----------------------------------------------|------|----------|---------|-------|-------|--------|------|-----|
| <b>gluconic acid</b>                          | 2    | Negative | 195.274 | 75.17 | 99.1  | 17.685 | 18.8 | 0   |
| <b>3'-CMP</b>                                 | 2.5  | Negative | 322.091 | 110.1 | 211   | 26.028 | 17.6 | 72  |
| <b>(S,S)-tartaric acid</b>                    | 2.17 | Negative | 148.97  | 73.05 | 87.11 | 16.624 | 10.6 | 52  |
| <b>thymidine-5'-diphospho-alpha-D-glucose</b> | 2.23 | Negative | 563.091 | 241   | 321.1 | 30.275 | 22.3 | 121 |
| <b>D-fructose 6-phosphate</b>                 | 2.27 | Negative | 258.991 | 79.06 | 97    | 38.163 | 14.7 | 65  |
| <b>xanthosine 5'-monophosphate</b>            | 2.27 | Negative | 363.009 | 151.1 | 211   | 27.191 | 18.3 | 83  |
| <b>folic acid</b>                             | 2.33 | Negative | 440.183 | 311.1 | 396.1 | 22.084 | 23.1 | 105 |
| <b>D-mannose 6-phosphate</b>                  | 2.75 | Negative | 258.991 | 97    | 199   | 15.006 | 12.6 | 61  |
| <b>L-cystathionine</b>                        | 4.1  | Negative | 221.122 | 120.1 | 134.1 | 11.972 | 11.1 | 58  |
| <b>D-ribulose 1,5-bisphosphate</b>            | 5.17 | Negative | 308.939 | 97.07 | 211.1 | 18.697 | 12.5 | 69  |

---
